# Supplementary material
Source: Springer Nature journal article supplement (https://www.springermedizin.de/resource/supplementary/13048_2013_236_MOESM7_ESM.pdf/9665192)

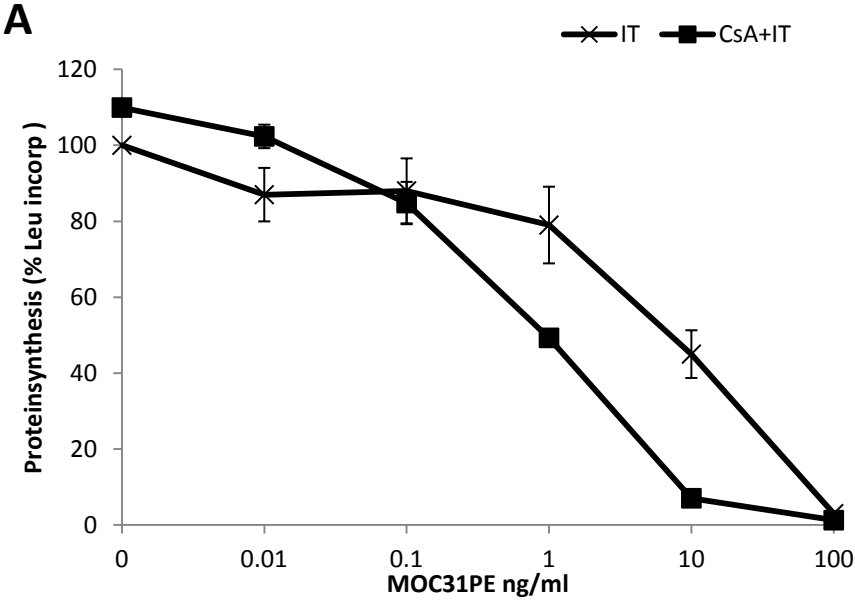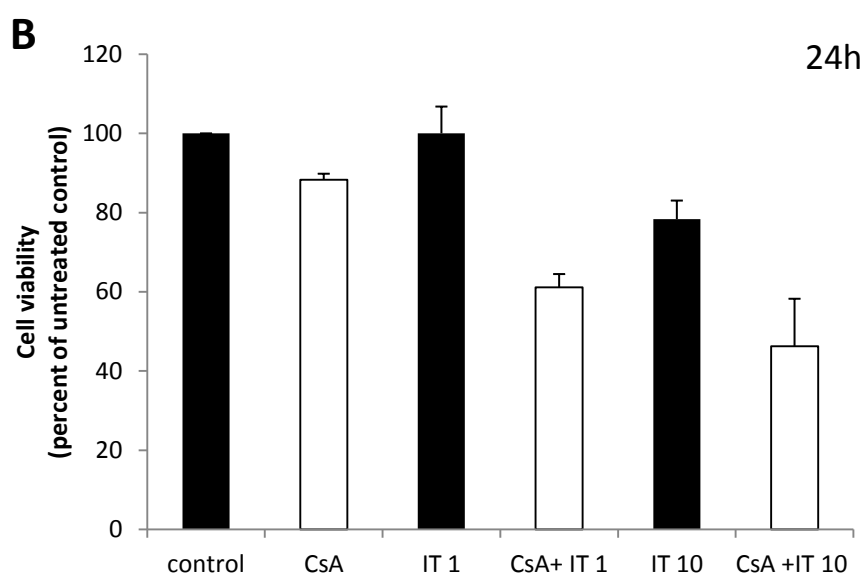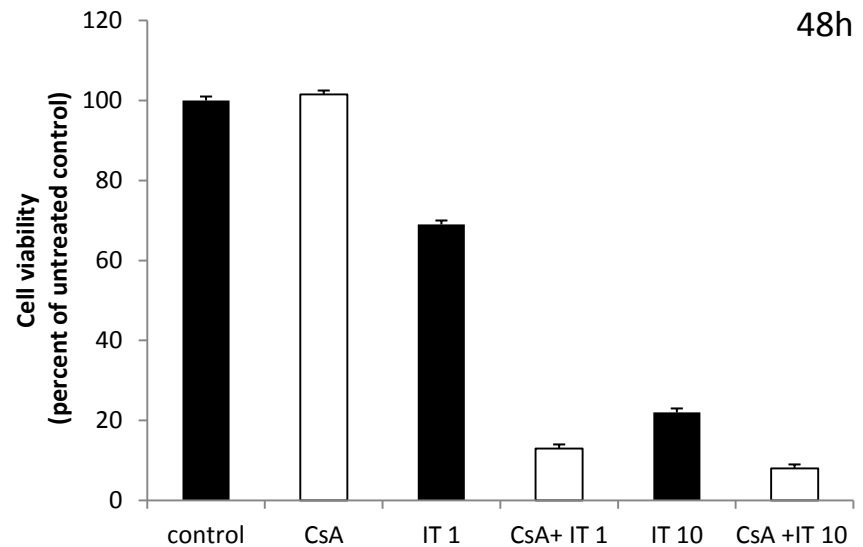

Supplement: MOESM7 [file 9665192]
